# Supplementary material
Source: Springer Nature journal article supplement (https://www.springermedizin.de/resource/supplementary/12881_2006_204_MOESM2_ESM.pdf/9452628)
Supplement: MOESM2 [file 9452628]

| Supplementary Table 2: Genotyping and statistical results for SNPs - individual genotypes |              |               |                      |              |                    |         |            |
|-------------------------------------------------------------------------------------------|--------------|---------------|----------------------|--------------|--------------------|---------|------------|
|                                                                                           | Polymorphism | variable      | Homozygote Reference | Heterozygous | Homozygote Variant | p-value | Test       |
| <b>Stage at Diagnosis</b>                                                                 | MMP9_1562    | 0             | 38 (66%)             | 17 (29%)     | 3 (5%)             |         |            |
|                                                                                           | MMP9_1562    | I             | 352 (71%)            | 138 (28%)    | 9 (2%)             |         |            |
|                                                                                           | MMP9_1562    | II            | 170 (73%)            | 62 (27%)     | 1 (0%)             |         |            |
|                                                                                           | MMP9_1562    | III           | 128 (77%)            | 36 (22%)     | 3 (2%)             |         |            |
|                                                                                           | MMP9_1562    | IV            | 8 (89%)              | 1 (11%)      | 0 (0%)             | 0.2     | Trend      |
| <b>Current Stage</b>                                                                      | MMP9_1562    | 0             | 36 (64%)             | 17 (30%)     | 3 (5%)             |         |            |
|                                                                                           | MMP9_1562    | I             | 300 (70%)            | 123 (29%)    | 8 (2%)             |         |            |
|                                                                                           | MMP9_1562    | II            | 118 (75%)            | 40 (25%)     | 0 (0%)             |         |            |
|                                                                                           | MMP9_1562    | III           | 159 (74%)            | 51 (24%)     | 4 (2%)             |         |            |
|                                                                                           | MMP9_1562    | IV            | 100 (78%)            | 26 (20%)     | 2 (2%)             | 0.12    | Trend      |
| <b>Thickness</b>                                                                          | MMP9_1562    | in situ       | 38 (66%)             | 17 (29%)     | 3 (5%)             |         |            |
|                                                                                           | MMP9_1562    | <1.01         | 218 (69%)            | 93 (29%)     | 6 (2%)             |         |            |
|                                                                                           | MMP9_1562    | 1.01 - 2.00   | 203 (75%)            | 65 (24%)     | 3 (1%)             |         |            |
|                                                                                           | MMP9_1562    | 2.01 - 4.00   | 118 (74%)            | 38 (24%)     | 3 (2%)             |         |            |
|                                                                                           | MMP9_1562    | >4.00         | 85 (71%)             | 33 (28%)     | 1 (1%)             | 0.36    | Trend      |
| <b>Clark Level</b>                                                                        | MMP9_1562    | I = in situ   | 38 (66%)             | 17 (29%)     | 3 (5%)             |         |            |
|                                                                                           | MMP9_1562    | II            | 74 (69%)             | 31 (29%)     | 2 (2%)             |         |            |
|                                                                                           | MMP9_1562    | III           | 99 (67%)             | 45 (30%)     | 4 (3%)             |         |            |
|                                                                                           | MMP9_1562    | IV            | 355 (74%)            | 123 (26%)    | 5 (1%)             |         |            |
|                                                                                           | MMP9_1562    | V             | 46 (67%)             | 22 (32%)     | 1 (1%)             | 0.32    | Trend      |
| <b>Tumor Infiltrating Lymphocytes</b>                                                     | MMP9_1562    | absent        | 148 (73%)            | 52 (26%)     | 4 (2%)             |         |            |
|                                                                                           | MMP9_1562    | non-brisk     | 281 (72%)            | 107 (27%)    | 3 (1%)             |         |            |
|                                                                                           | MMP9_1562    | brisk         | 23 (74%)             | 8 (26%)      | 0 (0%)             | 0.68    | Trend      |
| <b>Number of Moles</b>                                                                    | MMP9_1562    | none          | 187 (72%)            | 66 (26%)     | 6 (2%)             |         |            |
|                                                                                           | MMP9_1562    | few           | 358 (73%)            | 127 (26%)    | 8 (2%)             |         |            |
|                                                                                           | MMP9_1562    | moderate      | 116 (70%)            | 48 (29%)     | 2 (1%)             |         |            |
|                                                                                           | MMP9_1562    | many          | 29 (73%)             | 10 (25%)     | 1 (3%)             | 0.96    | Trend      |
| <b>Number of Freckles</b>                                                                 | MMP9_1562    | 1 = none      | 340 (71%)            | 130 (27%)    | 6 (1%)             |         |            |
|                                                                                           | MMP9_1562    | 2             | 183 (77%)            | 54 (23%)     | 2 (1%)             |         |            |
|                                                                                           | MMP9_1562    | 3             | 121 (71%)            | 44 (26%)     | 5 (3%)             |         |            |
|                                                                                           | MMP9_1562    | 4             | 43 (66%)             | 19 (29%)     | 3 (5%)             |         |            |
|                                                                                           | MMP9_1562    | 5             | 12 (71%)             | 5 (29%)      | 0 (0%)             |         |            |
|                                                                                           | MMP9_1562    | 6 = many      | 4 (67%)              | 2 (33%)      | 0 (0%)             | 0.44    | Trend      |
| <b>Phenotypic Index</b>                                                                   | MMP9_1562    | 1 = low risk  | 24 (63%)             | 14 (37%)     | 0 (0%)             |         |            |
|                                                                                           | MMP9_1562    | 2             | 159 (76%)            | 48 (23%)     | 1 (1%)             |         |            |
|                                                                                           | MMP9_1562    | 3             | 220 (70%)            | 85 (27%)     | 8 (3%)             |         |            |
|                                                                                           | MMP9_1562    | 4             | 241 (74%)            | 80 (25%)     | 5 (2%)             |         |            |
|                                                                                           | MMP9_1562    | 5 = high risk | 71 (68%)             | 30 (29%)     | 3 (3%)             | 0.32    | Trend      |
| <b>Sex</b>                                                                                | MMP9_1562    | F             | 310 (73%)            | 107 (25%)    | 8 (2%)             |         |            |
|                                                                                           | MMP9_1562    | M             | 406 (72%)            | 153 (27%)    | 9 (2%)             | 0.72    | Chi-Square |
| <b>Family History</b>                                                                     | MMP9_1562    | N             | 599 (73%)            | 207 (25%)    | 13 (2%)            |         |            |
|                                                                                           | MMP9_1562    | Y             | 112 (68%)            | 49 (30%)     | 4 (2%)             | 0.16    | Chi-Square |
| <b>Multiple Primary</b>                                                                   | MMP9_1562    | N             | 614 (73%)            | 214 (25%)    | 15 (2%)            |         |            |
|                                                                                           | MMP9_1562    | Y             | 102 (69%)            | 45 (30%)     | 2 (1%)             | 0.36    | Chi-Square |
| <b>Dysplastic Nevus</b>                                                                   | MMP9_1562    | N             | 396 (73%)            | 136 (25%)    | 9 (2%)             |         |            |
|                                                                                           | MMP9_1562    | Y             | 143 (66%)            | 69 (32%)     | 4 (2%)             | 0.08    | Chi-Square |
| <b>Ulceration</b>                                                                         | MMP9_1562    | absent        | 379 (71%)            | 145 (27%)    | 9 (2%)             |         |            |
|                                                                                           | MMP9_1562    | present       | 138 (74%)            | 47 (25%)     | 2 (1%)             | 0.44    | Chi-Square |
| <b>Regression</b>                                                                         | MMP9_1562    | absent        | 270 (72%)            | 100 (27%)    | 3 (1%)             |         |            |
|                                                                                           | MMP9_1562    | present       | 184 (71%)            | 71 (27%)     | 4 (2%)             | 0.6     | Chi-Square |
| <b>Lymphovascular Invasion</b>                                                            | MMP9_1562    | absent        | 404 (72%)            | 152 (27%)    | 7 (1%)             |         |            |
|                                                                                           | MMP9_1562    | present       | 50 (74%)             | 17 (25%)     | 1 (2%)             | 0.8     | Chi-Square |
| <b>Perineural Invasion</b>                                                                | MMP9_1562    | absent        | 306 (72%)            | 112 (27%)    | 5 (1%)             |         |            |
|                                                                                           | MMP9_1562    | present       | 42 (68%)             | 20 (32%)     | 0 (0%)             | 0.6     | Chi-Square |
| <b>Mitotic Index</b>                                                                      | MMP9_1562    | absent        | 73 (72%)             | 27 (27%)     | 2 (2%)             |         |            |
|                                                                                           | MMP9_1562    | present       | 327 (72%)            | 125 (27%)    | 4 (1%)             | 0.8     | Chi-Square |
| <b>Satellites</b>                                                                         | MMP9_1562    | absent        | 191 (76%)            | 59 (24%)     | 1 (0%)             |         |            |
|                                                                                           | MMP9_1562    | present       | 25 (83%)             | 5 (17%)      | 0 (0%)             | 0.36    | Chi-Square |
| <b>Solar Elastosis</b>                                                                    | MMP9_1562    | absent        | 18 (82%)             | 4 (18%)      | 0 (0%)             |         |            |
|                                                                                           | MMP9_1562    | present       | 31 (78%)             | 9 (23%)      | 0 (0%)             | 0.68    | Chi-Square |
| <b>Distant Metastasis</b>                                                                 | MMP9_1562    | N             | 615 (71%)            | 232 (27%)    | 15 (2%)            |         |            |

|                                       | Polymorphism | variable           | Homozygote Reference | Heterozygous | Homozygote Variant | p-value | Test       |
|---------------------------------------|--------------|--------------------|----------------------|--------------|--------------------|---------|------------|
| <b>Intransit Metastasis</b>           | MMP9_1562    | Y                  | 101 (78%)            | 26 (20%)     | 2 (2%)             | 0.12    | Chi-Square |
|                                       | MMP9_1562    | N                  | 668 (72%)            | 249 (27%)    | 16 (2%)            |         |            |
| <b>Tan/Burn Index</b>                 | MMP9_1562    | Y                  | 21 (78%)             | 5 (19%)      | 1 (4%)             | 0.68    | Chi-Square |
|                                       | MMP9_1562    | tend to tan        | 59 (65%)             | 30 (33%)     | 2 (2%)             |         |            |
| <b>Race</b>                           | MMP9_1562    | tend to sunburn    | 657 (73%)            | 230 (25%)    | 15 (2%)            | 0.12    | Chi-Square |
|                                       | MMP9_1562    | White non-Hispanic | 682 (72%)            | 254 (27%)    | 16 (2%)            |         |            |
|                                       | MMP9_1562    | Hispanic           | 9 (82%)              | 2 (18%)      | 0 (0%)             |         |            |
|                                       | MMP9_1562    | Black non-Hispanic | 10 (91%)             | 0 (0%)       | 1 (9%)             |         |            |
| <b>Site</b>                           | MMP9_1562    | Asian/Indian       | 2 (67%)              | 1 (33%)      | 0 (0%)             | 0.28    | Chi-Square |
|                                       | MMP9_1562    | extremities        | 378 (71%)            | 145 (27%)    | 10 (2%)            |         |            |
|                                       | MMP9_1562    | head & neck        | 49 (69%)             | 21 (30%)     | 1 (1%)             |         |            |
|                                       | MMP9_1562    | non-cutaneous      | 6 (55%)              | 3 (27%)      | 2 (18%)            |         |            |
| <b>Histology</b>                      | MMP9_1562    | trunk              | 249 (74%)            | 83 (25%)     | 4 (1%)             | <0.01   | Chi-Square |
|                                       | MMP9_1562    | desmoplastic       | 17 (74%)             | 6 (26%)      | 0 (0%)             |         |            |
|                                       | MMP9_1562    | other              | 171 (71%)            | 65 (27%)     | 4 (2%)             |         |            |
|                                       | MMP9_1562    | spitzoid           | 8 (80%)              | 2 (20%)      | 0 (0%)             |         |            |
| <b>Stage at Diagnosis</b>             | MMP9_1562    | unknown            | 520 (72%)            | 187 (26%)    | 13 (2%)            | 1       | Chi-Square |
|                                       | MMP9_279     | 0                  | 27 (47%)             | 22 (38%)     | 9 (16%)            |         |            |
|                                       | MMP9_279     | I                  | 200 (40%)            | 232 (46%)    | 72 (14%)           |         |            |
|                                       | MMP9_279     | II                 | 91 (39%)             | 117 (50%)    | 26 (11%)           |         |            |
|                                       | MMP9_279     | III                | 82 (49%)             | 67 (40%)     | 20 (12%)           |         |            |
| <b>Current Stage</b>                  | MMP9_279     | IV                 | 4 (44%)              | 5 (56%)      | 0 (0%)             | 0.32    | Trend      |
|                                       | MMP9_279     | 0                  | 25 (45%)             | 22 (39%)     | 9 (16%)            |         |            |
|                                       | MMP9_279     | I                  | 174 (40%)            | 199 (46%)    | 62 (14%)           |         |            |
|                                       | MMP9_279     | II                 | 60 (38%)             | 84 (53%)     | 15 (9%)            |         |            |
|                                       | MMP9_279     | III                | 99 (46%)             | 92 (43%)     | 25 (12%)           |         |            |
| <b>Thickness</b>                      | MMP9_279     | IV                 | 59 (46%)             | 52 (40%)     | 18 (14%)           | 0.36    | Trend      |
|                                       | MMP9_279     | in situ            | 27 (47%)             | 22 (38%)     | 9 (16%)            |         |            |
|                                       | MMP9_279     | <1.01              | 127 (40%)            | 149 (46%)    | 45 (14%)           |         |            |
|                                       | MMP9_279     | 1.01 - 2.00        | 117 (43%)            | 117 (43%)    | 38 (14%)           |         |            |
|                                       | MMP9_279     | 2.01 - 4.00        | 65 (41%)             | 74 (46%)     | 21 (13%)           |         |            |
| <b>Clark Level</b>                    | MMP9_279     | >4.00              | 43 (36%)             | 67 (55%)     | 11 (9%)            | 0.48    | Trend      |
|                                       | MMP9_279     | I = in situ        | 27 (47%)             | 22 (38%)     | 9 (16%)            |         |            |
|                                       | MMP9_279     | II                 | 38 (35%)             | 57 (53%)     | 13 (12%)           |         |            |
|                                       | MMP9_279     | III                | 64 (43%)             | 65 (43%)     | 21 (14%)           |         |            |
|                                       | MMP9_279     | IV                 | 194 (40%)            | 227 (47%)    | 67 (14%)           |         |            |
| <b>Tumor Infiltrating Lymphocytes</b> | MMP9_279     | V                  | 26 (38%)             | 36 (52%)     | 7 (10%)            | 0.72    | Trend      |
|                                       | MMP9_279     | absent             | 89 (43%)             | 98 (48%)     | 19 (9%)            |         |            |
|                                       | MMP9_279     | non-brisk          | 155 (39%)            | 195 (49%)    | 46 (12%)           |         |            |
|                                       | MMP9_279     | brisk              | 14 (45%)             | 13 (42%)     | 4 (13%)            | 0.76    | Trend      |
| <b>Number of Moles</b>                | MMP9_279     | none               | 117 (45%)            | 107 (41%)    | 36 (14%)           |         |            |
|                                       | MMP9_279     | few                | 201 (40%)            | 232 (47%)    | 64 (13%)           |         |            |
|                                       | MMP9_279     | moderate           | 69 (41%)             | 78 (46%)     | 22 (13%)           |         |            |
|                                       | MMP9_279     | many               | 17 (43%)             | 18 (45%)     | 5 (13%)            | 0.88    | Trend      |
| <b>Number of Freckles</b>             | MMP9_279     | 1 = none           | 198 (41%)            | 222 (46%)    | 61 (13%)           |         |            |
|                                       | MMP9_279     | 2                  | 114 (48%)            | 100 (42%)    | 26 (11%)           |         |            |
|                                       | MMP9_279     | 3                  | 70 (41%)             | 77 (45%)     | 25 (15%)           |         |            |
|                                       | MMP9_279     | 4                  | 23 (35%)             | 29 (45%)     | 13 (20%)           |         |            |
|                                       | MMP9_279     | 5                  | 6 (35%)              | 10 (59%)     | 1 (6%)             |         |            |
|                                       | MMP9_279     | 6 = many           | 3 (50%)              | 3 (50%)      | 0 (0%)             | 0.48    | Trend      |
| <b>Phenotypic Index</b>               | MMP9_279     | 1 = low risk       | 8 (21%)              | 23 (61%)     | 7 (18%)            |         |            |
|                                       | MMP9_279     | 2                  | 99 (47%)             | 84 (40%)     | 27 (13%)           |         |            |
|                                       | MMP9_279     | 3                  | 129 (41%)            | 143 (45%)    | 44 (14%)           |         |            |
|                                       | MMP9_279     | 4                  | 145 (44%)            | 149 (45%)    | 34 (10%)           |         |            |
|                                       | MMP9_279     | 5 = high risk      | 39 (37%)             | 49 (47%)     | 17 (16%)           | 0.12    | Trend      |
| <b>Sex</b>                            | MMP9_279     | F                  | 185 (43%)            | 192 (45%)    | 52 (12%)           |         |            |
|                                       | MMP9_279     | M                  | 235 (41%)            | 259 (45%)    | 78 (14%)           | 0.4     | Chi-Square |
| <b>Family History</b>                 | MMP9_279     | N                  | 352 (43%)            | 368 (45%)    | 105 (13%)          |         |            |
|                                       | MMP9_279     | Y                  | 65 (39%)             | 78 (47%)     | 24 (14%)           | 0.36    | Chi-Square |
| <b>Multiple Primary</b>               | MMP9_279     | N                  | 361 (43%)            | 379 (45%)    | 109 (13%)          |         |            |
|                                       | MMP9_279     | Y                  | 59 (39%)             | 71 (47%)     | 21 (14%)           | 0.44    | Chi-Square |
| <b>Dysplastic Nevus</b>               | MMP9_279     | N                  | 239 (44%)            | 235 (43%)    | 69 (13%)           |         |            |
|                                       | MMP9_279     | Y                  | 80 (37%)             | 103 (47%)    | 35 (16%)           | 0.04    | Chi-Square |
| <b>Ulceration</b>                     | MMP9_279     | absent             | 213 (40%)            | 254 (47%)    | 70 (13%)           |         |            |

|                                       | Polymorphism | variable           | Homozygote Reference | Heterozygous | Homozygote Variant | p-value | Test       |
|---------------------------------------|--------------|--------------------|----------------------|--------------|--------------------|---------|------------|
| <b>Regression</b>                     | MMP9_279     | present            | 77 (41%)             | 89 (47%)     | 24 (13%)           | 0.84    | Chi-Square |
|                                       | MMP9_279     | absent             | 165 (44%)            | 174 (46%)    | 38 (10%)           |         |            |
| <b>Lymphovascular Invasion</b>        | MMP9_279     | present            | 100 (38%)            | 130 (50%)    | 32 (12%)           | 0.16    | Chi-Square |
|                                       | MMP9_279     | absent             | 230 (40%)            | 271 (48%)    | 68 (12%)           |         |            |
| <b>Perineural Invasion</b>            | MMP9_279     | present            | 28 (41%)             | 33 (49%)     | 7 (10%)            | 0.76    | Chi-Square |
|                                       | MMP9_279     | absent             | 174 (41%)            | 202 (47%)    | 52 (12%)           |         |            |
| <b>Mitotic Index</b>                  | MMP9_279     | present            | 25 (40%)             | 32 (52%)     | 5 (8%)             | 0.68    | Chi-Square |
|                                       | MMP9_279     | absent             | 42 (41%)             | 48 (47%)     | 13 (13%)           |         |            |
| <b>Satellites</b>                     | MMP9_279     | present            | 188 (41%)            | 220 (48%)    | 53 (12%)           | 0.88    | Chi-Square |
|                                       | MMP9_279     | absent             | 110 (43%)            | 126 (50%)    | 18 (7%)            |         |            |
| <b>Solar Elastosis</b>                | MMP9_279     | present            | 13 (43%)             | 13 (43%)     | 4 (13%)            | 0.6     | Chi-Square |
|                                       | MMP9_279     | absent             | 15 (68%)             | 7 (32%)      | 0 (0%)             |         |            |
| <b>Distant Metastasis</b>             | MMP9_279     | present            | 15 (38%)             | 21 (53%)     | 4 (10%)            | <0.01   | Chi-Square |
|                                       | MMP9_279     | N                  | 360 (41%)            | 397 (46%)    | 112 (13%)          |         |            |
| <b>Intransit Metastasis</b>           | MMP9_279     | Y                  | 60 (46%)             | 52 (40%)     | 18 (14%)           | 0.56    | Chi-Square |
|                                       | MMP9_279     | N                  | 384 (41%)            | 435 (46%)    | 122 (13%)          |         |            |
| <b>Tan/Burn Index</b>                 | MMP9_279     | Y                  | 17 (63%)             | 7 (26%)      | 3 (11%)            | 0.08    | Chi-Square |
|                                       | MMP9_279     | tend to tan        | 26 (28%)             | 48 (53%)     | 17 (19%)           |         |            |
| <b>Race</b>                           | MMP9_279     | tend to sunburn    | 394 (43%)            | 403 (44%)    | 113 (13%)          | <0.01   | Chi-Square |
|                                       | MMP9_279     | White non-Hispanic | 401 (42%)            | 432 (45%)    | 127 (13%)          |         |            |
| <b>Site</b>                           | MMP9_279     | Hispanic           | 6 (55%)              | 5 (46%)      | 0 (0%)             |         |            |
|                                       | MMP9_279     | Black non-Hispanic | 5 (46%)              | 5 (46%)      | 1 (9%)             |         |            |
| <b>Site</b>                           | MMP9_279     | Asian/Indian       | 1 (33%)              | 2 (67%)      | 0 (0%)             | 0.84    | Chi-Square |
|                                       | MMP9_279     | extremities        | 212 (40%)            | 248 (46%)    | 75 (14%)           |         |            |
| <b>Histology</b>                      | MMP9_279     | head & neck        | 25 (35%)             | 30 (42%)     | 16 (23%)           |         |            |
|                                       | MMP9_279     | non-cutaneous      | 6 (50%)              | 4 (33%)      | 2 (17%)            |         |            |
| <b>Histology</b>                      | MMP9_279     | trunk              | 152 (45%)            | 155 (46%)    | 34 (10%)           | 0.12    | Chi-Square |
|                                       | MMP9_279     | desmoplastic       | 7 (30%)              | 12 (52%)     | 4 (17%)            |         |            |
| <b>Stage at Diagnosis</b>             | MMP9_279     | other              | 91 (37%)             | 122 (50%)    | 31 (13%)           |         |            |
|                                       | MMP9_279     | spitzoid           | 3 (30%)              | 6 (60%)      | 1 (10%)            |         |            |
| <b>Stage at Diagnosis</b>             | MMP9_279     | unknown            | 319 (44%)            | 311 (43%)    | 94 (13%)           | 0.4     | Chi-Square |
|                                       | MMP9_574     | 0                  | 28 (90%)             | 2 (7%)       | 1 (3%)             |         |            |
| <b>Current Stage</b>                  | MMP9_574     | I                  | 257 (92%)            | 21 (8%)      | 0 (0%)             |         |            |
|                                       | MMP9_574     | II                 | 100 (89%)            | 13 (12%)     | 0 (0%)             |         |            |
| <b>Current Stage</b>                  | MMP9_574     | III                | 84 (89%)             | 10 (11%)     | 0 (0%)             |         |            |
|                                       | MMP9_574     | IV                 | 3 (75%)              | 1 (25%)      | 0 (0%)             | <0.01   | Trend      |
| <b>Thickness</b>                      | MMP9_574     | 0                  | 27 (90%)             | 2 (7%)       | 1 (3%)             |         |            |
|                                       | MMP9_574     | I                  | 221 (92%)            | 19 (8%)      | 0 (0%)             |         |            |
| <b>Thickness</b>                      | MMP9_574     | II                 | 68 (88%)             | 9 (12%)      | 0 (0%)             |         |            |
|                                       | MMP9_574     | III                | 87 (90%)             | 10 (10%)     | 0 (0%)             |         |            |
| <b>Thickness</b>                      | MMP9_574     | IV                 | 79 (92%)             | 7 (8%)       | 0 (0%)             | 0.04    | Trend      |
|                                       | MMP9_574     | in situ            | 28 (90%)             | 2 (7%)       | 1 (3%)             |         |            |
| <b>Clark Level</b>                    | MMP9_574     | <1.01              | 172 (93%)            | 14 (8%)      | 0 (0%)             |         |            |
|                                       | MMP9_574     | 1.01 - 2.00        | 126 (93%)            | 10 (7%)      | 0 (0%)             |         |            |
| <b>Clark Level</b>                    | MMP9_574     | 2.01 - 4.00        | 68 (85%)             | 12 (15%)     | 0 (0%)             |         |            |
|                                       | MMP9_574     | >4.00              | 59 (92%)             | 5 (8%)       | 0 (0%)             | <0.01   | Trend      |
| <b>Tumor Infiltrating Lymphocytes</b> | MMP9_574     | I = in situ        | 28 (90%)             | 2 (7%)       | 1 (3%)             |         |            |
|                                       | MMP9_574     | II                 | 62 (93%)             | 5 (8%)       | 0 (0%)             |         |            |
| <b>Number of Moles</b>                | MMP9_574     | III                | 79 (93%)             | 6 (7%)       | 0 (0%)             |         |            |
|                                       | MMP9_574     | IV                 | 217 (90%)            | 24 (10%)     | 0 (0%)             |         |            |
| <b>Number of Moles</b>                | MMP9_574     | V                  | 34 (87%)             | 5 (13%)      | 0 (0%)             | 0.04    | Trend      |
|                                       | MMP9_574     | absent             | 106 (89%)            | 13 (11%)     | 0 (0%)             |         |            |
| <b>Number of Moles</b>                | MMP9_574     | non-brisk          | 162 (90%)            | 18 (10%)     | 0 (0%)             |         |            |
|                                       | MMP9_574     | brisk              | 15 (94%)             | 1 (6%)       | 0 (0%)             | 0.84    | Trend      |
| <b>Number of Freckles</b>             | MMP9_574     | none               | 153 (92%)            | 13 (8%)      | 1 (1%)             |         |            |
|                                       | MMP9_574     | few                | 211 (91%)            | 22 (9%)      | 0 (0%)             |         |            |
| <b>Number of Freckles</b>             | MMP9_574     | moderate           | 72 (95%)             | 4 (5%)       | 0 (0%)             |         |            |
|                                       | MMP9_574     | many               | 24 (86%)             | 4 (14%)      | 0 (0%)             | 0.6     | Trend      |
| <b>Number of Freckles</b>             | MMP9_574     | 1 = none           | 227 (90%)            | 24 (10%)     | 1 (0%)             |         |            |
|                                       | MMP9_574     | 2                  | 124 (89%)            | 15 (11%)     | 0 (0%)             |         |            |
| <b>Number of Freckles</b>             | MMP9_574     | 3                  | 81 (93%)             | 6 (7%)       | 0 (0%)             |         |            |
|                                       | MMP9_574     | 4                  | 32 (100%)            | 0 (0%)       | 0 (0%)             |         |            |
| <b>Number of Freckles</b>             | MMP9_574     | 5                  | 6 (100%)             | 0 (0%)       | 0 (0%)             |         |            |
|                                       | MMP9_574     | 6 = many           | 1 (50%)              | 1 (50%)      | 0 (0%)             | 0.44    | Trend      |

|                                | Polymorphism | variable           | Homozygote Reference | Heterozygous | Homozygote Variant | p-value | Test       |
|--------------------------------|--------------|--------------------|----------------------|--------------|--------------------|---------|------------|
| <b>Phenotypic Index</b>        | MMP9_574     | 1 = low risk       | 15 (75%)             | 4 (20%)      | 1 (5%)             |         |            |
|                                | MMP9_574     | 2                  | 87 (88%)             | 12 (12%)     | 0 (0%)             |         |            |
|                                | MMP9_574     | 3                  | 165 (95%)            | 8 (5%)       | 0 (0%)             |         |            |
|                                | MMP9_574     | 4                  | 161 (90%)            | 17 (10%)     | 0 (0%)             |         |            |
|                                | MMP9_574     | 5 = high risk      | 56 (90%)             | 6 (10%)      | 0 (0%)             | <0.01   | Chi-Square |
| <b>Sex</b>                     | MMP9_574     | F                  | 220 (91%)            | 21 (9%)      | 1 (0%)             |         |            |
|                                | MMP9_574     | M                  | 265 (91%)            | 26 (9%)      | 0 (0%)             | 0.84    | Chi-Square |
| <b>Family History</b>          | MMP9_574     | N                  | 395 (90%)            | 45 (10%)     | 0 (0%)             |         |            |
|                                | MMP9_574     | Y                  | 88 (97%)             | 2 (2%)       | 1 (1%)             | 0.08    | Chi-Square |
| <b>Multiple Primary</b>        | MMP9_574     | N                  | 410 (90%)            | 44 (10%)     | 1 (0%)             |         |            |
|                                | MMP9_574     | Y                  | 75 (96%)             | 3 (4%)       | 0 (0%)             | 0.08    | Chi-Square |
| <b>Dysplastic Nevus</b>        | MMP9_574     | N                  | 307 (90%)            | 32 (9%)      | 1 (0%)             |         |            |
|                                | MMP9_574     | Y                  | 117 (93%)            | 9 (7%)       | 0 (0%)             | 0.36    | Chi-Square |
| <b>Ulceration</b>              | MMP9_574     | absent             | 254 (91%)            | 25 (9%)      | 0 (0%)             |         |            |
|                                | MMP9_574     | present            | 85 (89%)             | 11 (12%)     | 0 (0%)             | 0.48    | Chi-Square |
| <b>Regression</b>              | MMP9_574     | absent             | 181 (90%)            | 20 (10%)     | 0 (0%)             |         |            |
|                                | MMP9_574     | present            | 104 (90%)            | 12 (10%)     | 0 (0%)             | 0.92    | Chi-Square |
| <b>Lymphovascular Invasion</b> | MMP9_574     | absent             | 267 (90%)            | 30 (10%)     | 0 (0%)             |         |            |
|                                | MMP9_574     | present            | 26 (93%)             | 2 (7%)       | 0 (0%)             | 0.6     | Chi-Square |
| <b>Perineural Invasion</b>     | MMP9_574     | absent             | 176 (90%)            | 20 (10%)     | 0 (0%)             |         |            |
|                                | MMP9_574     | present            | 26 (90%)             | 3 (10%)      | 0 (0%)             | 1       | Chi-Square |
| <b>Mitotic Index</b>           | MMP9_574     | absent             | 58 (92%)             | 5 (8%)       | 0 (0%)             |         |            |
|                                | MMP9_574     | present            | 184 (89%)            | 23 (11%)     | 0 (0%)             | 0.48    | Chi-Square |
| <b>Satellites</b>              | MMP9_574     | absent             | 116 (89%)            | 14 (11%)     | 0 (0%)             |         |            |
|                                | MMP9_574     | present            | 14 (93%)             | 1 (7%)       | 0 (0%)             | 0.64    | Chi-Square |
| <b>Solar Elastosis</b>         | MMP9_574     | absent             | 11 (92%)             | 1 (8%)       | 0 (0%)             |         |            |
|                                | MMP9_574     | present            | 22 (85%)             | 4 (15%)      | 0 (0%)             | 0.56    | Chi-Square |
| <b>Distant Metastasis</b>      | MMP9_574     | N                  | 405 (91%)            | 40 (9%)      | 1 (0%)             |         |            |
|                                | MMP9_574     | Y                  | 79 (92%)             | 7 (8%)       | 0 (0%)             | 0.72    | Chi-Square |
| <b>Intransit Metastasis</b>    | MMP9_574     | N                  | 449 (92%)            | 39 (8%)      | 1 (0%)             |         |            |
|                                | MMP9_574     | Y                  | 19 (91%)             | 2 (10%)      | 0 (0%)             | 0.84    | Chi-Square |
| <b>Tan/Burn Index</b>          | MMP9_574     | tend to tan        | 45 (90%)             | 4 (8%)       | 1 (2%)             |         |            |
|                                | MMP9_574     | tend to sunburn    | 440 (91%)            | 43 (9%)      | 0 (0%)             | 0.48    | Chi-Square |
| <b>Race</b>                    | MMP9_574     | White non-Hispanic | 465 (92%)            | 42 (8%)      | 1 (0%)             |         |            |
|                                | MMP9_574     | Hispanic           | 5 (63%)              | 3 (38%)      | 0 (0%)             |         |            |
|                                | MMP9_574     | Black non-Hispanic | 4 (67%)              | 2 (33%)      | 0 (0%)             |         |            |
|                                | MMP9_574     | Asian/Indian       | 2 (100%)             | 0 (0%)       | 0 (0%)             | 0.04    | Chi-Square |
| <b>Site</b>                    | MMP9_574     | extremities        | 263 (88%)            | 36 (12%)     | 0 (0%)             |         |            |
|                                | MMP9_574     | head & neck        | 36 (97%)             | 1 (3%)       | 0 (0%)             |         |            |
|                                | MMP9_574     | non-cutaneous      | 6 (100%)             | 0 (0%)       | 0 (0%)             |         |            |
|                                | MMP9_574     | trunk              | 164 (96%)            | 6 (4%)       | 1 (1%)             | 0.04    | Chi-Square |
| <b>Histology</b>               | MMP9_574     | desmoplastic       | 7 (88%)              | 1 (13%)      | 0 (0%)             |         |            |
|                                | MMP9_574     | other              | 117 (91%)            | 12 (9%)      | 0 (0%)             |         |            |
|                                | MMP9_574     | spitzoid           | 2 (50%)              | 2 (50%)      | 0 (0%)             |         |            |
|                                | MMP9_574     | unknown            | 359 (92%)            | 32 (8%)      | 1 (0%)             | 0.16    | Chi-Square |
| <b>Stage at Diagnosis</b>      | MMP9_668     | 0                  | 38 (66%)             | 18 (31%)     | 2 (3%)             |         |            |
|                                | MMP9_668     | I                  | 355 (71%)            | 135 (27%)    | 12 (2%)            |         |            |
|                                | MMP9_668     | II                 | 164 (70%)            | 68 (29%)     | 1 (0%)             |         |            |
|                                | MMP9_668     | III                | 130 (77%)            | 35 (21%)     | 3 (2%)             |         |            |
|                                | MMP9_668     | IV                 | 8 (89%)              | 1 (11%)      | 0 (0%)             | 0.28    | Trend      |
| <b>Current Stage</b>           | MMP9_668     | 0                  | 36 (64%)             | 18 (32%)     | 2 (4%)             |         |            |
|                                | MMP9_668     | I                  | 302 (70%)            | 120 (28%)    | 11 (3%)            |         |            |
|                                | MMP9_668     | II                 | 114 (72%)            | 44 (28%)     | 0 (0%)             |         |            |
|                                | MMP9_668     | III                | 163 (76%)            | 49 (23%)     | 4 (2%)             |         |            |
|                                | MMP9_668     | IV                 | 98 (77%)             | 28 (22%)     | 2 (2%)             | 0.28    | Trend      |
| <b>Thickness</b>               | MMP9_668     | in situ            | 38 (66%)             | 18 (31%)     | 2 (3%)             |         |            |
|                                | MMP9_668     | <1.01              | 219 (69%)            | 91 (29%)     | 9 (3%)             |         |            |
|                                | MMP9_668     | 1.01 - 2.00        | 205 (75%)            | 64 (24%)     | 3 (1%)             |         |            |
|                                | MMP9_668     | 2.01 - 4.00        | 115 (72%)            | 41 (26%)     | 3 (2%)             |         |            |
|                                | MMP9_668     | >4.00              | 84 (70%)             | 35 (29%)     | 1 (1%)             | 0.52    | Trend      |
| <b>Clark Level</b>             | MMP9_668     | I = in situ        | 38 (66%)             | 18 (31%)     | 2 (3%)             |         |            |
|                                | MMP9_668     | II                 | 73 (68%)             | 32 (30%)     | 2 (2%)             |         |            |
|                                | MMP9_668     | III                | 101 (67%)            | 42 (28%)     | 7 (5%)             |         |            |
|                                | MMP9_668     | IV                 | 355 (73%)            | 125 (26%)    | 5 (1%)             |         |            |



|                                       | Polymorphism | variable           | Homozygote Reference | Heterozygous | Homozygote Variant | p-value | Test       |
|---------------------------------------|--------------|--------------------|----------------------|--------------|--------------------|---------|------------|
|                                       | MMP9_668     | V                  | 45 (65%)             | 23 (33%)     | 1 (1%)             | 0.16    | Trend      |
| <b>Tumor Infiltrating Lymphocytes</b> | MMP9_668     | absent             | 146 (71%)            | 55 (27%)     | 4 (2%)             |         |            |
|                                       | MMP9_668     | non-brisk          | 279 (71%)            | 109 (28%)    | 5 (1%)             |         |            |
|                                       | MMP9_668     | brisk              | 24 (77%)             | 7 (23%)      | 0 (0%)             | 0.84    | Trend      |
| <b>Number of Moles</b>                | MMP9_668     | none               | 183 (71%)            | 68 (26%)     | 8 (3%)             |         |            |
|                                       | MMP9_668     | few                | 359 (72%)            | 128 (26%)    | 9 (2%)             |         |            |
|                                       | MMP9_668     | moderate           | 119 (71%)            | 47 (28%)     | 1 (1%)             |         |            |
|                                       | MMP9_668     | many               | 30 (75%)             | 9 (23%)      | 1 (3%)             | 0.68    | Trend      |
| <b>Number of Freckles</b>             | MMP9_668     | 1 = none           | 338 (71%)            | 134 (28%)    | 6 (1%)             |         |            |
|                                       | MMP9_668     | 2                  | 183 (76%)            | 54 (23%)     | 3 (1%)             |         |            |
|                                       | MMP9_668     | 3                  | 122 (71%)            | 44 (26%)     | 5 (3%)             |         |            |
|                                       | MMP9_668     | 4                  | 44 (68%)             | 17 (26%)     | 4 (6%)             |         |            |
|                                       | MMP9_668     | 5                  | 12 (71%)             | 5 (29%)      | 0 (0%)             |         |            |
|                                       | MMP9_668     | 6 = many           | 4 (67%)              | 2 (33%)      | 0 (0%)             | 0.24    | Trend      |
| <b>Phenotypic Index</b>               | MMP9_668     | 1 = low risk       | 20 (53%)             | 18 (47%)     | 0 (0%)             |         |            |
|                                       | MMP9_668     | 2                  | 160 (77%)            | 46 (22%)     | 2 (1%)             |         |            |
|                                       | MMP9_668     | 3                  | 222 (71%)            | 83 (26%)     | 10 (3%)            |         |            |
|                                       | MMP9_668     | 4                  | 240 (73%)            | 82 (25%)     | 5 (2%)             |         |            |
|                                       | MMP9_668     | 5 = high risk      | 73 (70%)             | 30 (29%)     | 2 (2%)             | 0.04    | Trend      |
| <b>Sex</b>                            | MMP9_668     | F                  | 311 (73%)            | 109 (26%)    | 7 (2%)             |         |            |
|                                       | MMP9_668     | M                  | 405 (71%)            | 153 (27%)    | 12 (2%)            | 0.48    | Chi-Square |
| <b>Family History</b>                 | MMP9_668     | N                  | 598 (73%)            | 211 (26%)    | 14 (2%)            |         |            |
|                                       | MMP9_668     | Y                  | 113 (69%)            | 47 (29%)     | 5 (3%)             | 0.2     | Chi-Square |
| <b>Multiple Primary</b>               | MMP9_668     | N                  | 612 (72%)            | 218 (26%)    | 17 (2%)            |         |            |
|                                       | MMP9_668     | Y                  | 104 (70%)            | 43 (29%)     | 2 (1%)             | 0.68    | Chi-Square |
| <b>Dysplastic Nevus</b>               | MMP9_668     | N                  | 395 (73%)            | 137 (25%)    | 11 (2%)            |         |            |
|                                       | MMP9_668     | Y                  | 145 (67%)            | 68 (31%)     | 4 (2%)             | 0.16    | Chi-Square |
| <b>Ulceration</b>                     | MMP9_668     | absent             | 379 (71%)            | 144 (27%)    | 12 (2%)            |         |            |
|                                       | MMP9_668     | present            | 135 (72%)            | 51 (27%)     | 2 (1%)             | 0.6     | Chi-Square |
| <b>Regression</b>                     | MMP9_668     | absent             | 271 (72%)            | 101 (27%)    | 4 (1%)             |         |            |
|                                       | MMP9_668     | present            | 180 (70%)            | 74 (29%)     | 5 (2%)             | 0.4     | Chi-Square |
| <b>Lymphovascular Invasion</b>        | MMP9_668     | absent             | 400 (71%)            | 156 (28%)    | 9 (2%)             |         |            |
|                                       | MMP9_668     | present            | 50 (74%)             | 16 (24%)     | 2 (3%)             | 0.84    | Chi-Square |
| <b>Perineural Invasion</b>            | MMP9_668     | absent             | 303 (72%)            | 114 (27%)    | 7 (2%)             |         |            |
|                                       | MMP9_668     | present            | 42 (68%)             | 20 (32%)     | 0 (0%)             | 0.76    | Chi-Square |
| <b>Mitotic Index</b>                  | MMP9_668     | absent             | 73 (72%)             | 27 (27%)     | 2 (2%)             |         |            |
|                                       | MMP9_668     | present            | 324 (71%)            | 128 (28%)    | 6 (1%)             | 0.96    | Chi-Square |
| <b>Satellites</b>                     | MMP9_668     | absent             | 189 (75%)            | 62 (25%)     | 1 (0%)             |         |            |
|                                       | MMP9_668     | present            | 25 (83%)             | 5 (17%)      | 0 (0%)             | 0.32    | Chi-Square |
| <b>Solar Elastosis</b>                | MMP9_668     | absent             | 18 (82%)             | 4 (18%)      | 0 (0%)             |         |            |
|                                       | MMP9_668     | present            | 30 (75%)             | 10 (25%)     | 0 (0%)             | 0.52    | Chi-Square |
| <b>Distant Metastasis</b>             | MMP9_668     | N                  | 617 (71%)            | 232 (27%)    | 17 (2%)            |         |            |
|                                       | MMP9_668     | Y                  | 99 (77%)             | 28 (22%)     | 2 (2%)             | 0.2     | Chi-Square |
| <b>Intransit Metastasis</b>           | MMP9_668     | N                  | 667 (71%)            | 252 (27%)    | 18 (2%)            |         |            |
|                                       | MMP9_668     | Y                  | 22 (82%)             | 4 (15%)      | 1 (4%)             | 0.4     | Chi-Square |
| <b>Tan/Burn Index</b>                 | MMP9_668     | tend to tan        | 55 (60%)             | 34 (37%)     | 2 (3%)             |         |            |
|                                       | MMP9_668     | tend to sunburn    | 661 (73%)            | 228 (25%)    | 17 (2%)            | 0.02    | Chi-Square |
| <b>Race</b>                           | MMP9_668     | White non-Hispanic | 687 (72%)            | 251 (26%)    | 18 (2%)            |         |            |
|                                       | MMP9_668     | Hispanic           | 7 (64%)              | 4 (36%)      | 0 (0%)             |         |            |
|                                       | MMP9_668     | Black non-Hispanic | 7 (64%)              | 3 (27%)      | 1 (9%)             |         |            |
|                                       | MMP9_668     | Asian/Indian       | 2 (67%)              | 1 (33%)      | 0 (0%)             | 0.68    | Chi-Square |
| <b>Site</b>                           | MMP9_668     | extremities        | 375 (70%)            | 146 (27%)    | 12 (2%)            |         |            |
|                                       | MMP9_668     | head & neck        | 49 (69%)             | 21 (30%)     | 1 (1%)             |         |            |
|                                       | MMP9_668     | non-cutaneous      | 6 (55%)              | 3 (27%)      | 2 (18%)            |         |            |
|                                       | MMP9_668     | trunk              | 252 (74%)            | 84 (25%)     | 4 (1%)             | <0.01   | Chi-Square |
| <b>Histology</b>                      | MMP9_668     | desmoplastic       | 16 (70%)             | 7 (30%)      | 0 (0%)             |         |            |
|                                       | MMP9_668     | other              | 170 (70%)            | 68 (28%)     | 4 (2%)             |         |            |
|                                       | MMP9_668     | spitzoid           | 8 (80%)              | 2 (20%)      | 0 (0%)             |         |            |
|                                       | MMP9_668     | unknown            | 522 (72%)            | 185 (26%)    | 15 (2%)            | 0.96    | Chi-Square |
